# Supplementary material for: Fluctuating Environments, Sexual Selection and the Evolution of Flexible Mate Choice in Birds
Source: PubMed Central journal article supplement (PMC3281128; doi:10.1371/journal.pone.0032311), 2012-02-16
Supplement: pone.0032311.s004.pdf [file pone.0032311.s004.pdf]

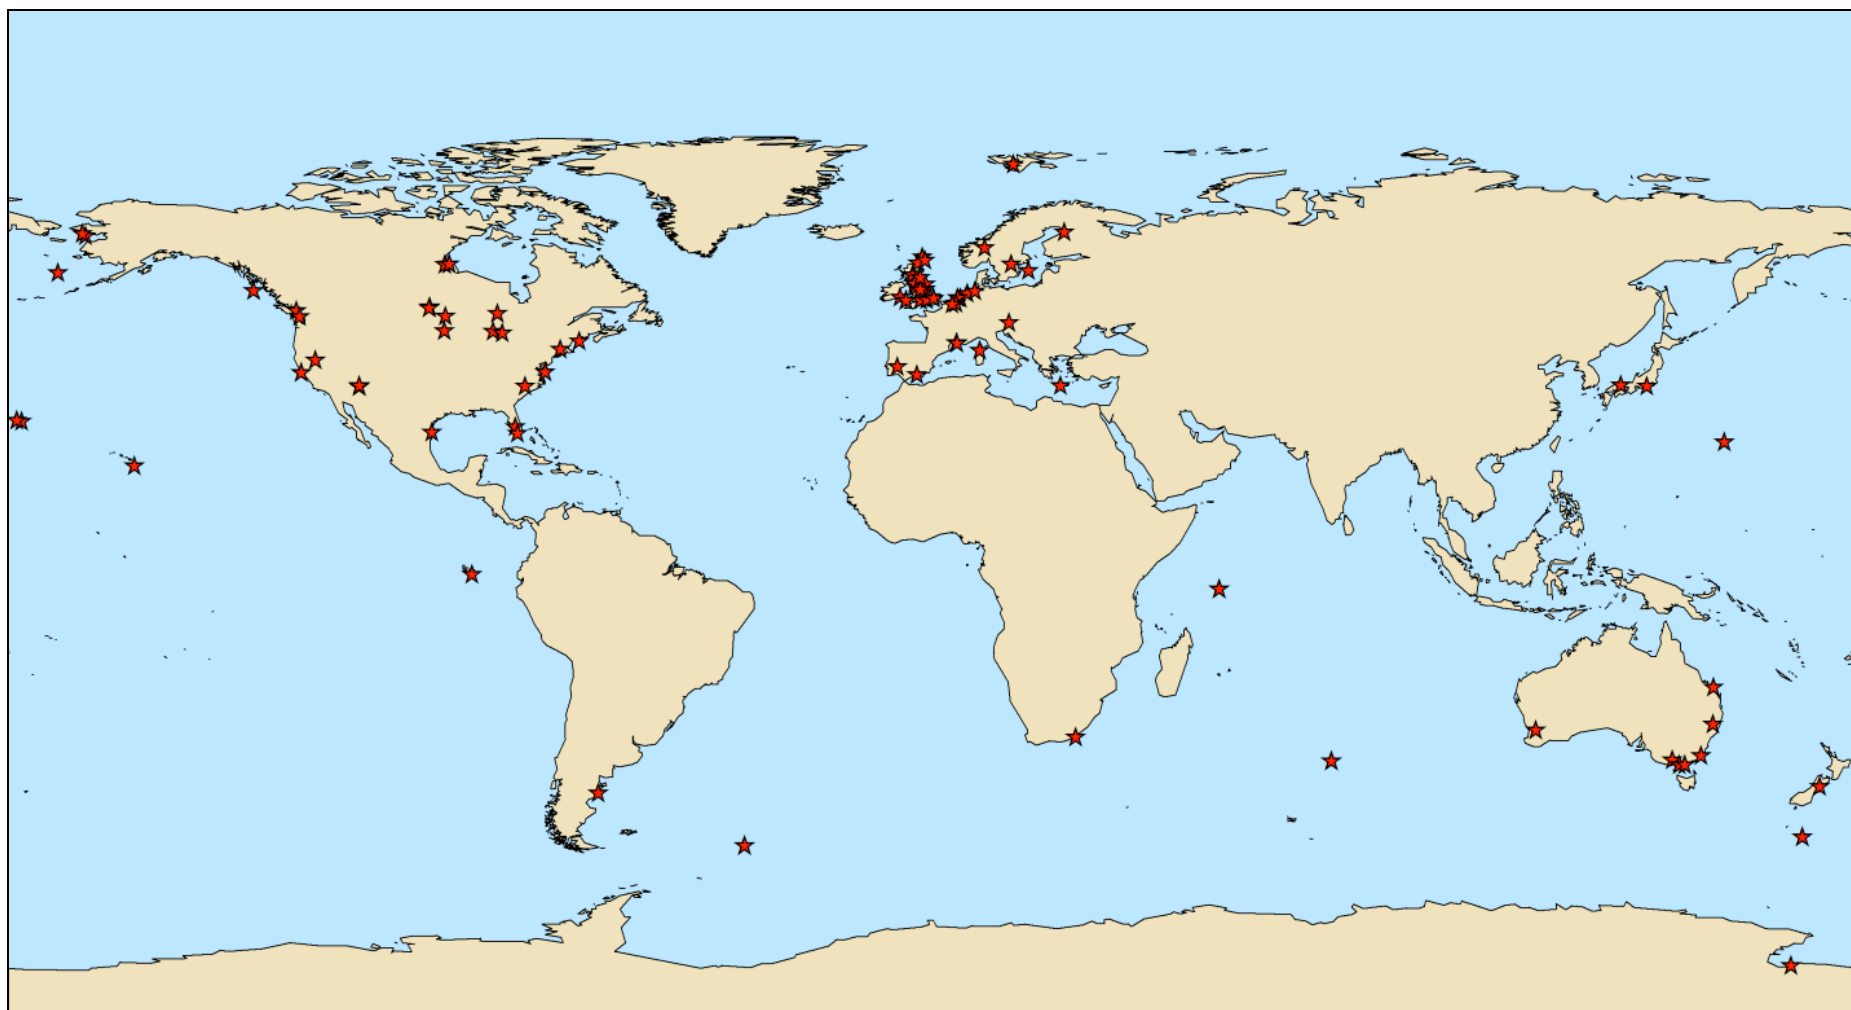

**Figure S4** Global distribution of study sites in the divorce dataset.
